# Supplementary material for: Blood eosinophil count-guided corticosteroid therapy and as a prognostic biomarker of exacerbations of chronic obstructive pulmonary disease: a systematic review and meta-analysis
Source: PubMed Central journal article supplement — Ther Adv Chronic Dis. 2021 Jul 7;12:20406223211028768. doi: 10.1177/20406223211028768 (PMC8267047; doi:10.1177/20406223211028768), 2021-07-07
Supplement: sj-pdf-1-taj-10.1177_20406223211028768.pdf [file sj-pdf-1-taj-10.1177_20406223211028768.pdf]

## Supplementary Material

### **Blood eosinophil count-guided corticosteroid therapy and as a prognostic biomarker of exacerbations of chronic obstructive pulmonary disease: A systematic review and meta-analysis**

**Table S1.** Risk of bias in observational studies assessed using NOS scales

**Figure S1.** Risk of bias summary in RCTs assessed using the Cochrane Handbook for Systematic Reviews of Interventions

**Figure S2.** Risk of bias graph in RCTs assessed using the Cochrane Handbook for Systematic Reviews of Interventions

**Figure S3.** The mean difference of FEV<sub>1</sub> change from baseline ICS vs non-ICS treatment among patients with baseline BEC < 2%

**Figure S4.** The mean difference of FEV<sub>1</sub> change from baseline ICS vs non-ICS treatment among patients with baseline BEC ≥ 2%

**Figure S5.** The mean difference of FEV<sub>1</sub> change from baseline ICS vs placebo treatment among patients with baseline BEC < 2%

**Figure S6.** The mean difference of FEV<sub>1</sub> change from baseline ICS vs placebo treatment among patients with baseline BEC ≥ 2%

**Figure S7.** The mean difference of FEV<sub>1</sub> change from baseline ICS+LAMA/LABA vs LAMA/LABA treatment among patients with baseline BEC < 2%

**Figure S8.** The mean difference of FEV<sub>1</sub> change from baseline ICS+LAMA/LABA vs LAMA/LABA treatment among patients with baseline BEC ≥ 2%

**Figure S9.** The mean difference of FEV<sub>1</sub> change from baseline ICS vs non-ICS treatment among patients with baseline BEC < 150cells/μL

**Figure S10.** The mean difference of FEV<sub>1</sub> change from baseline ICS vs non-ICS treatment among patients with baseline BEC ≥ 150cells/μL

**Figure S11.** The mean difference of FEV<sub>1</sub> change from baseline ICS vs non-ICS treatment among patients with baseline BEC < 300cells/μL

**Figure S12.** The mean difference of FEV<sub>1</sub> change from baseline ICS vs non-ICS treatment among patients with baseline BEC ≥ 300cells/μL

**Figure S13.** The mean difference of SGRQ score change from baseline ICS vs non-ICS treatment among patients with baseline BEC < 2%

**Figure S14.** The mean difference of SGRQ score change from baseline ICS vs non-ICS treatment among patients with baseline BEC ≥ 2%

**Figure S15.** The mean difference of SGRQ score change from baseline ICS vs placebo treatment among patients with baseline BEC < 2%

**Figure S16.** The mean difference of SGRQ score change from baseline ICS vs placebo treatment among patients with baseline BEC ≥ 2%

**Figure S17.** The mean difference of SGRQ score change from baseline ICS+LAMA/LABA vs LAMA/LABA treatment among patients with baseline BEC < 2%

**Figure S18.** The mean difference of SGRQ score change from baseline ICS+LAMA/LABA vs LAMA/LABA treatment among patients with baseline BEC ≥ 2%

**Figure S19.** The risk ratio of exacerbations COPD ICS vs non-ICS treatment among patients with baseline BEC ≥ 2%

**Figure S20.** The risk ratio of exacerbations COPD ICS vs non-ICS treatment among patients with baseline BEC < 2%

**Figure S21.** The risk ratio of exacerbations COPD ICS vs non-ICS treatment among patients with baseline BEC  $\geq$  3%

**Figure S22.** The risk ratio of exacerbations COPD ICS vs non-ICS treatment among patients with baseline BEC < 3%

**Figure S23.** The risk ratio of exacerbations COPD ICS vs non-ICS treatment among patients with baseline BEC  $\geq$  150 cells/ $\mu$ L

**Figure S24.** The risk ratio of exacerbations COPD ICS vs non-ICS treatment among patients with baseline BEC < 150 cells/ $\mu$ L

**Figure S25.** The risk ratio of exacerbations COPD ICS vs non-ICS treatment among patients with baseline BEC  $\geq$  200 cells/ $\mu$ L

**Figure S26.** The risk ratio of exacerbations COPD ICS vs non-ICS treatment among patients with baseline BEC < 200 cells/ $\mu$ L

**Figure S27.** The risk ratio of exacerbations COPD ICS vs non-ICS treatment among patients with baseline BEC  $\geq$  300 cells/ $\mu$ L

**Figure S28.** The risk ratio of exacerbations COPD ICS vs non-ICS treatment among patients with baseline BEC < 300 cells/ $\mu$ L

**Figure S29.** The odds ratio of exacerbations COPD baseline BEC  $\geq$  2% vs baseline BEC < 2%

**Figure S30.** The odds ratio of exacerbations COPD baseline BEC  $\geq$  3% vs baseline BEC < 3%

**Figure S31.** The odds ratio of exacerbations COPD baseline BEC  $\geq$  4% vs baseline BEC < 4%

**Figure S32.** The odds ratio of exacerbations COPD baseline BEC  $\geq$  5% vs baseline BEC < 5%

**Figure S33.** The odds ratio of exacerbations COPD baseline BEC  $\geq 150$  cells/ $\mu$ L vs baseline BEC  $< 150$  cells/ $\mu$ L

**Figure S34.** The odds ratio of exacerbations COPD baseline BEC  $\geq 200$  cells/ $\mu$ L vs baseline BEC  $< 200$  cells/ $\mu$ L

**Figure S35.** The odds ratio of exacerbations COPD baseline BEC  $\geq 300$  cells/ $\mu$ L vs baseline BEC  $< 300$  cells/ $\mu$ L

**Figure S36.** The odds ratio of exacerbations COPD baseline BEC  $\geq 400$  cells/ $\mu$ L vs baseline BEC  $< 400$  cells/ $\mu$ L

**Figure S37.** The odds ratio of exacerbations COPD baseline BEC  $\geq 500$  cells/ $\mu$ L vs baseline BEC  $< 500$  cells/ $\mu$ L

**Figure S38.** The hazard ratio of mortality baseline BEC  $\geq 2\%$  vs baseline BEC  $< 2\%$

**Figure S39.** The hazard ratio of mortality baseline BEC  $\geq 200$  cells/ $\mu$ L vs baseline BEC  $< 200$  cells/ $\mu$ L

**Figure S40.** The hazard ratio of mortality baseline BEC  $\geq 300$  cells/ $\mu$ L vs baseline BEC  $< 300$  cells/ $\mu$ L

**Figure S41.** The odds ratio of GOLD III+IV in patients with baseline high BEC vs low BEC

**Figure S42.** The mean difference of baseline FEV1/FVC in patients with baseline high BEC vs low BEC

**Table S1.** Risk of bias in observational studies assessed using NOS scales

| <b>Reference</b>                  | <b>Selection</b> | <b>Comparability</b> | <b>outcome</b> |
|-----------------------------------|------------------|----------------------|----------------|
| Aksoy2018 <sup>1</sup>            | ☆☆☆☆             | ☆☆                   | ☆☆☆            |
| Bafadhel2016 <sup>2</sup>         | ☆☆☆              | ☆☆                   | ☆☆             |
| Bélanger2018 <sup>3</sup>         | ☆☆☆              | ☆☆                   | ☆☆☆            |
| Chan2020 <sup>4</sup>             | ☆☆☆              | ☆☆                   | ☆☆             |
| Cheng2016 <sup>5</sup>            | ☆☆☆              | ☆☆                   | ☆☆             |
| Couillard2017 <sup>6</sup>        | ☆☆               | ☆☆                   | ☆☆             |
| Disantostefano2016 <sup>7</sup>   | ☆☆☆☆             | ☆☆                   | ☆☆☆            |
| Duman2015 <sup>8</sup>            | ☆☆☆              | ☆☆                   | ☆☆             |
| Gonzalez-Barcala2019 <sup>9</sup> | ☆☆☆              | ☆☆                   | ☆☆             |
| Hasegawa2016 <sup>10</sup>        | ☆☆☆☆             | ☆☆                   | ☆☆             |
| Hastie2017 <sup>11</sup>          | ☆☆☆☆             | ☆☆                   | ☆☆☆            |
| Hegewald2020 <sup>12</sup>        | ☆☆☆☆             | ☆☆                   | ☆☆☆            |
| Kerkhof2017 <sup>13</sup>         | ☆☆☆☆             | ☆☆                   | ☆☆☆            |
| Landis2018 <sup>14</sup>          | ☆☆☆☆             | ☆☆                   | ☆☆             |
| Lv2021 <sup>15</sup>              | ☆☆☆              | ☆☆                   | ☆☆             |
| Mendy2018 <sup>16</sup>           | ☆☆☆              | ☆☆                   | ☆☆☆            |
| Nishimura2021 <sup>17</sup>       | ☆☆☆              | ☆☆                   | ☆☆             |
| Oh2018 <sup>18</sup>              | ☆☆☆              | ☆☆                   | ☆☆☆            |
| Oshagbemi 2018 <sup>19</sup>      | ☆☆☆☆             | ☆☆                   | ☆☆☆            |
| Peng2021 <sup>20</sup>            | ☆☆☆              | ☆☆                   | ☆☆             |
| Poder2018 <sup>21</sup>           | ☆☆☆              | ☆☆                   | ☆☆☆            |
| Prins2017 <sup>22</sup>           | ☆☆☆              | ☆☆                   | ☆☆             |
| Roche2017 <sup>23</sup>           | ☆☆☆☆             | ☆☆                   | ☆☆☆            |
| Serafino-Agrusa2016 <sup>24</sup> | ☆☆               | ☆☆                   | ☆☆             |
| Song 2017 <sup>25</sup>           | ☆☆☆☆             | ☆☆                   | ☆☆☆            |
| Vedel-Krogh2018 <sup>26</sup>     | ☆☆☆☆             | ☆☆                   | ☆☆☆            |
| Yun2018 <sup>27</sup>             | ☆☆☆              | ☆☆                   | ☆☆☆            |
| Zeiger2018 <sup>28</sup>          | ☆☆☆☆             | ☆☆                   | ☆☆☆            |
| Zhang2020 <sup>29</sup>           | ☆☆☆              | ☆☆                   | ☆☆☆            |
| Zysman2017 <sup>30</sup>          | ☆☆☆              | ☆☆                   | ☆☆             |

NOS: Newcastle-Ottawa scale

**Figure S1.** Risk of bias summary in RCTs assessed using the Cochrane Handbook for Systematic Reviews of Interventions

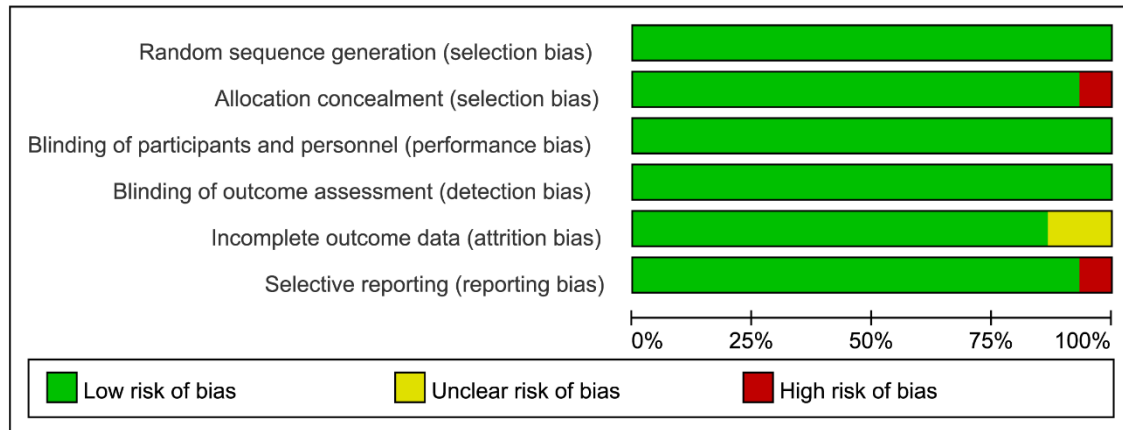

**Figure S2.** Risk of bias graph in RCTs assessed using the Cochrane Handbook for Systematic Reviews of Interventions

|                      | Random sequence generation (selection bias) | Allocation concealment (selection bias) | Blinding of participants and personnel (performance bias) | Blinding of outcome assessment (detection bias) | Incomplete outcome data (attrition bias) | Selective reporting (reporting bias) |
|----------------------|---------------------------------------------|-----------------------------------------|-----------------------------------------------------------|-------------------------------------------------|------------------------------------------|--------------------------------------|
| Bafadhel 2012        | +                                           | +                                       | +                                                         | +                                               | +                                        | +                                    |
| Barnes 2016          | +                                           | +                                       | +                                                         | +                                               | +                                        | +                                    |
| Chapman 2018         | +                                           | +                                       | +                                                         | +                                               | +                                        | +                                    |
| Ferguson 2018        | +                                           | +                                       | +                                                         | +                                               | +                                        | +                                    |
| Papi 2017            | +                                           | +                                       | +                                                         | +                                               | ?                                        | +                                    |
| Papi 2018            | +                                           | +                                       | +                                                         | +                                               | +                                        | +                                    |
| Pascoe 2015          | +                                           | +                                       | +                                                         | +                                               | +                                        | +                                    |
| Pavord2016(SCO30002) | +                                           | +                                       | +                                                         | +                                               | +                                        | +                                    |
| Pavord2016(SCO40036) | +                                           | +                                       | +                                                         | +                                               | +                                        | +                                    |
| Pavord2016(SFCB3024) | +                                           | +                                       | +                                                         | +                                               | +                                        | +                                    |
| Roche 2017           | +                                           | +                                       | +                                                         | +                                               | +                                        | +                                    |
| Siddiqui 2015        | +                                           | +                                       | +                                                         | +                                               | +                                        | +                                    |
| Singh 2020           | +                                           | ●                                       | +                                                         | +                                               | ?                                        | ●                                    |
| Vestbo 2017          | +                                           | +                                       | +                                                         | +                                               | +                                        | +                                    |
| Watz 2016            | +                                           | +                                       | +                                                         | +                                               | +                                        | +                                    |

**Figure S3.** The mean difference of FEV<sub>1</sub> change from baseline ICS vs non-ICS treatment among patients with baseline BEC < 2%

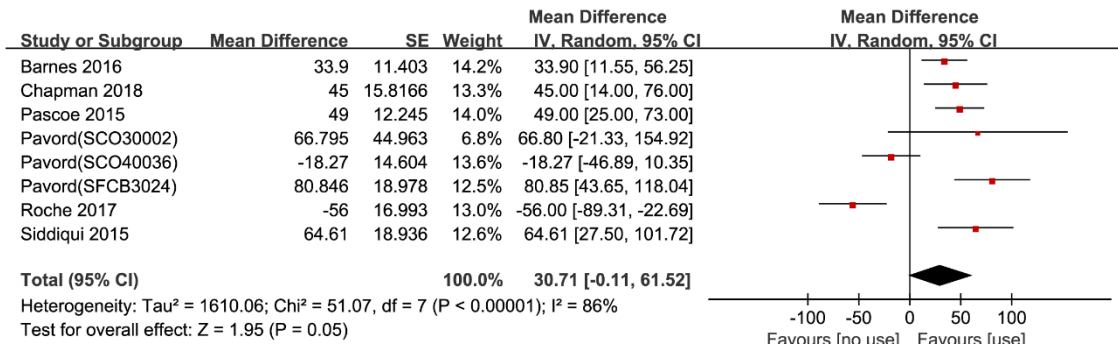

**Figure S4.** The mean difference of FEV<sub>1</sub> change from baseline ICS vs non-ICS treatment among patients with baseline BEC ≥ 2%

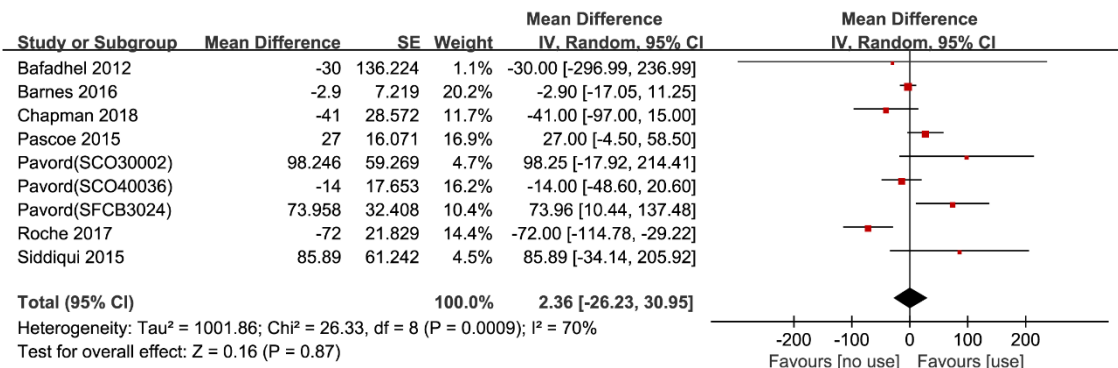

**Figure S5.** The mean difference of FEV<sub>1</sub> change from baseline ICS vs placebo treatment among patients with baseline BEC < 2%

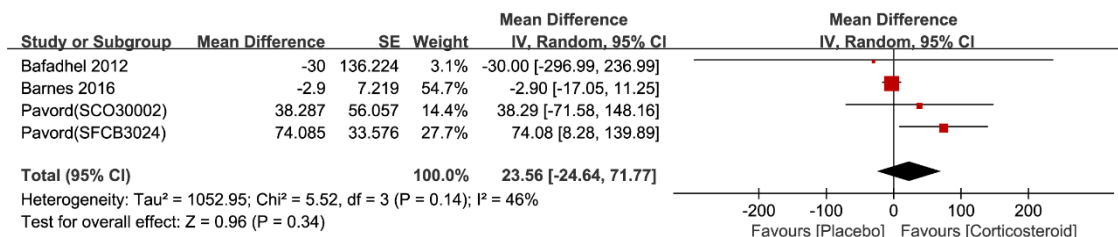



**Figure S6.** The mean difference of FEV<sub>1</sub> change from baseline ICS vs placebo treatment among patients with baseline BEC  $\geq$  2%

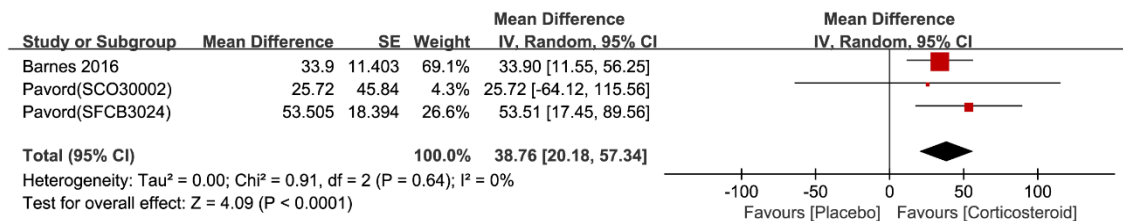

**Figure S7.** The mean difference of FEV<sub>1</sub> change from baseline ICS+LAMA/LABA vs LAMA/LABA treatment among patients with baseline BEC < 2%

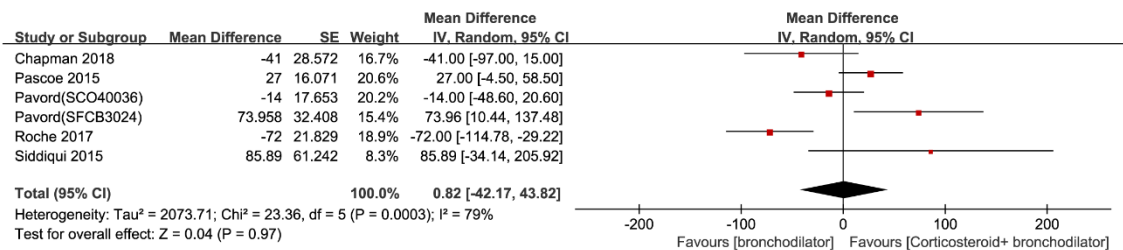

**Figure S8.** The mean difference of FEV<sub>1</sub> change from baseline ICS+LAMA/LABA vs LAMA/LABA treatment among patients with baseline BEC  $\geq$  2%

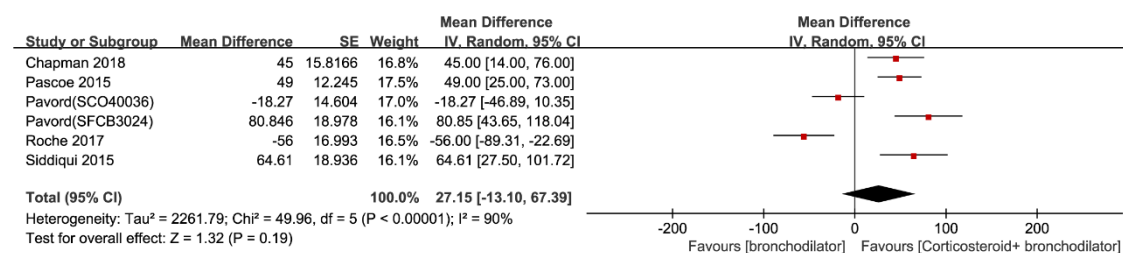

**Figure S9.** The mean difference of FEV<sub>1</sub> change from baseline ICS vs non-ICS treatment among patients with baseline BEC < 150cells/Ml

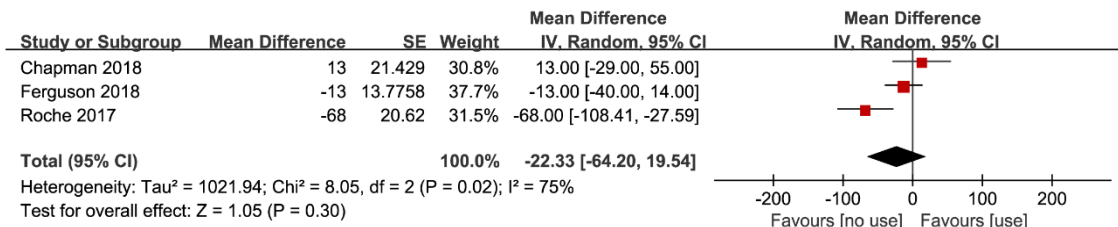

**Figure S10.** The mean difference of FEV<sub>1</sub> change from baseline ICS vs non-ICS treatment among patients with baseline BEC ≥ 150cells/μL

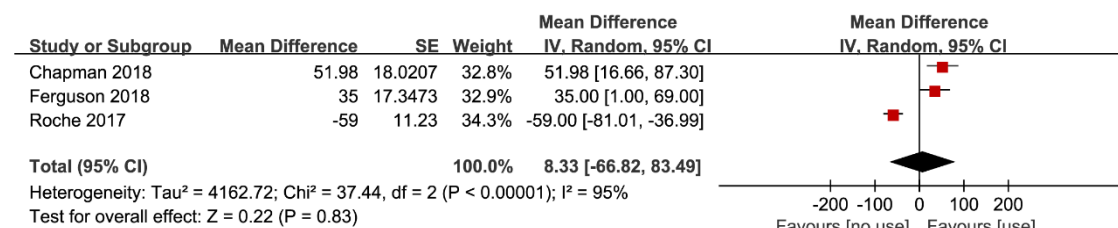

**Figure S11.** The mean difference of FEV<sub>1</sub> change from baseline ICS vs non-ICS treatment among patients with baseline BEC < 300cells/μL

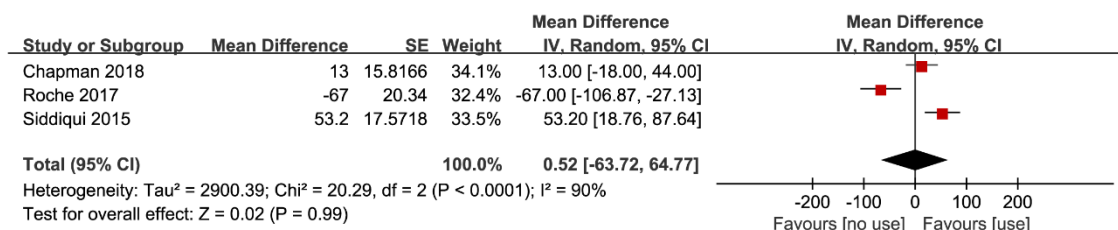

**Figure S12.** The mean difference of FEV<sub>1</sub> change from baseline ICS vs non-ICS treatment among patients with baseline BEC  $\geq$  300cells/ $\mu$ L

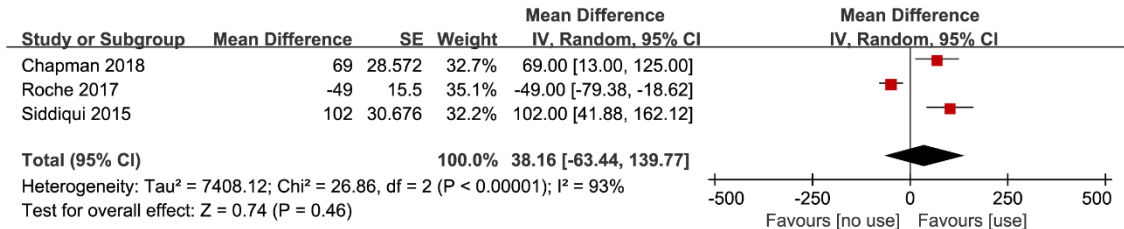

**Figure S13.** The mean difference of SGRQ score change from baseline ICS vs non-ICS treatment among patients with baseline BEC < 2%

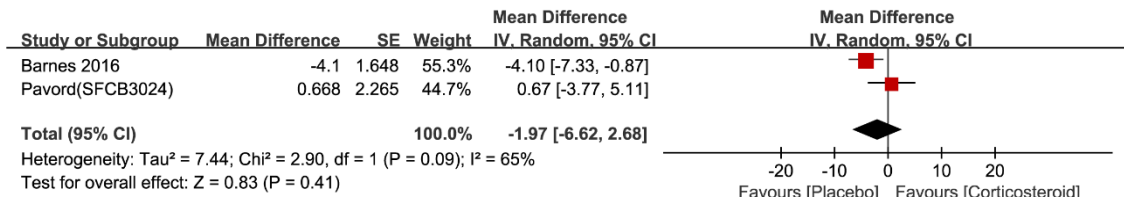

**Figure S14.** The mean difference of SGRQ score change from baseline ICS vs non-ICS treatment among patients with baseline BEC  $\geq$  2%

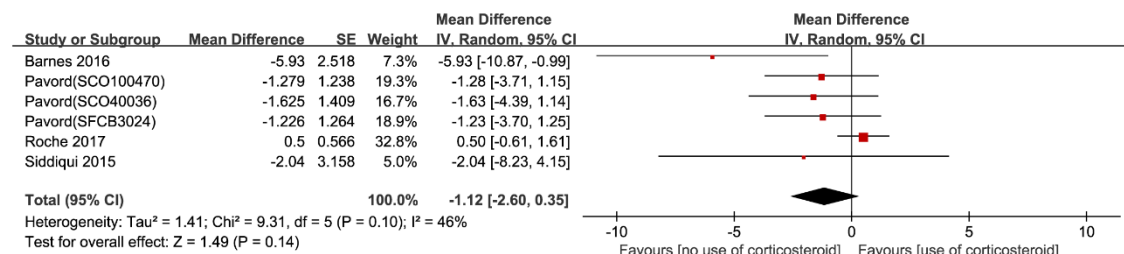

**Figure S15.** The mean difference of SGRQ score change from baseline ICS vs placebo treatment among patients with baseline BEC < 2%

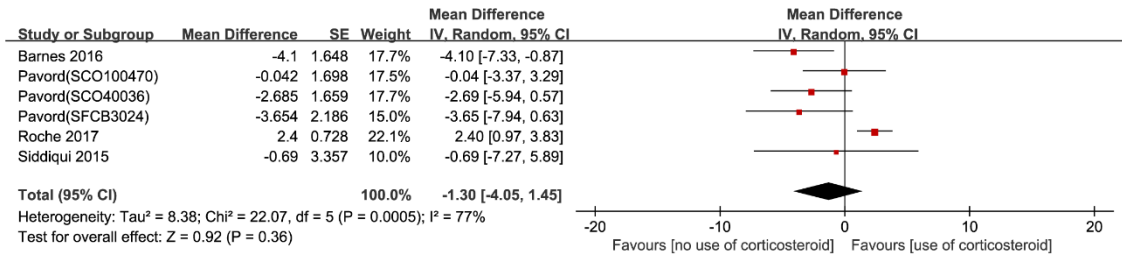

**Figure S16.** The mean difference of SGRQ score change from baseline ICS vs placebo treatment among patients with baseline BEC ≥ 2%

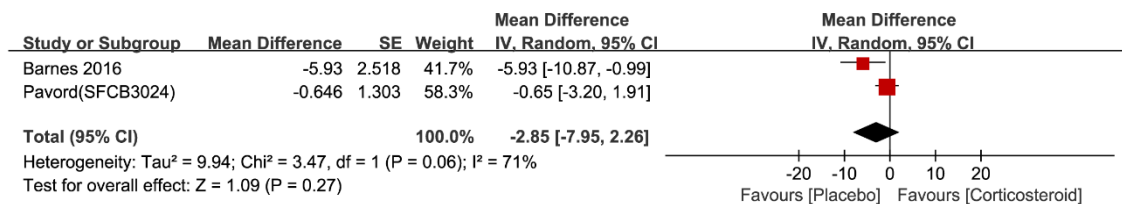

**Figure S17.** The mean difference of SGRQ score change from baseline ICS+LAMA/LABA vs LAMA/LABA treatment among patients with baseline BEC < 2%

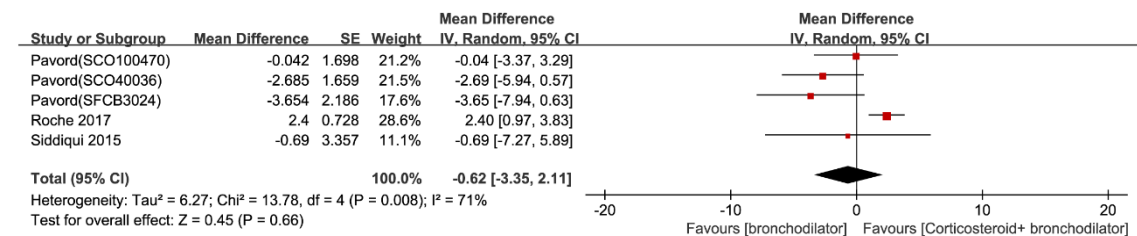

**Figure S18.** The mean difference of SGRQ score change from baseline ICS+LAMA/LABA vs LAMA/LABA treatment among patients with baseline BEC  $\geq 2\%$

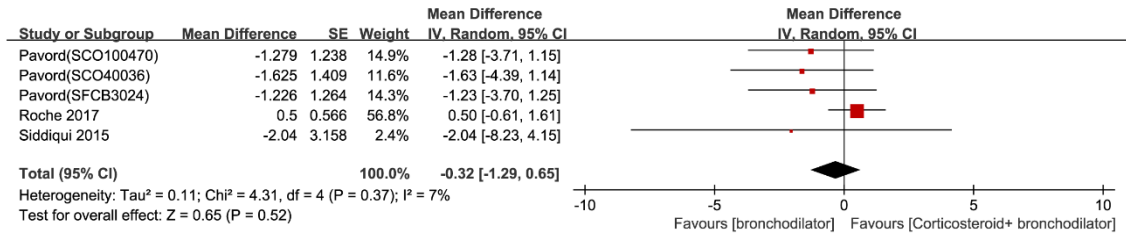

**Figure S19.** The risk ratio of exacerbations COPD ICS vs non-ICS treatment among patients with baseline BEC  $\geq 2\%$

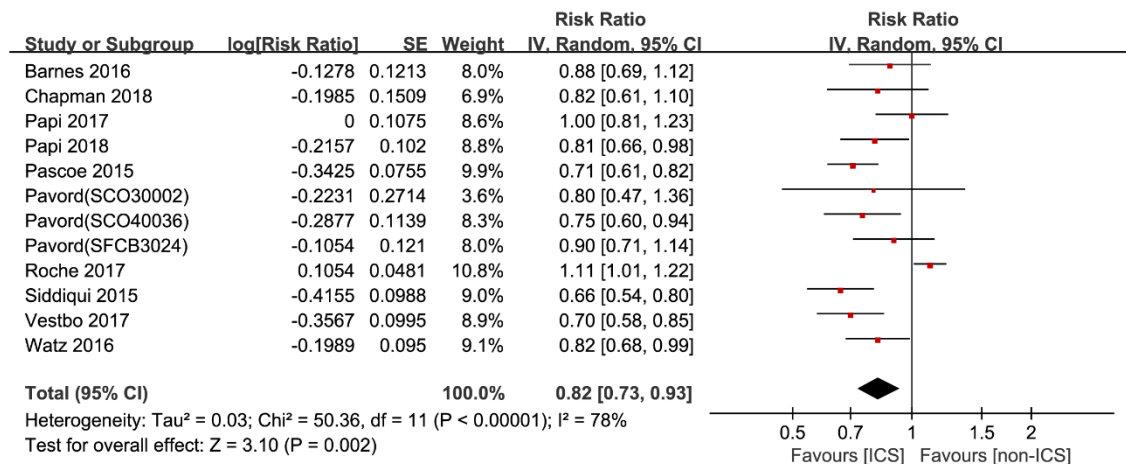

**Figure S20.** The risk ratio of exacerbations COPD ICS vs non-ICS treatment among patients with baseline BEC  $< 2\%$

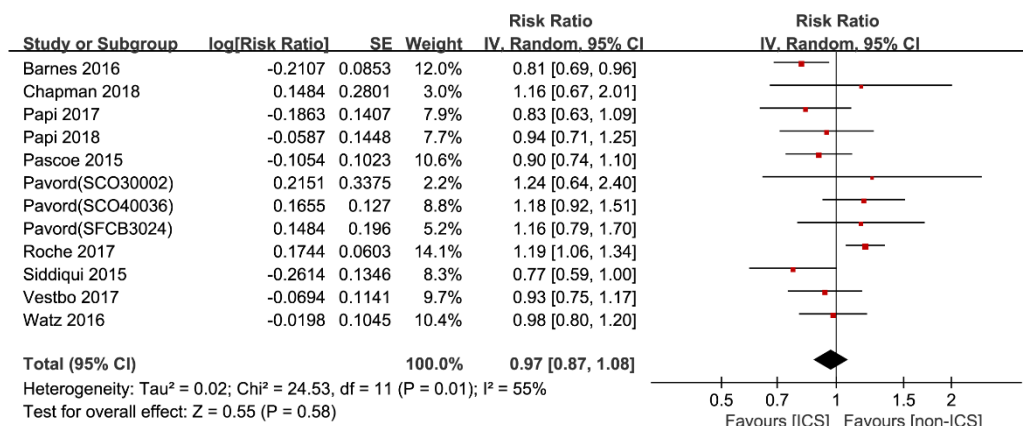

**Figure S21.** The risk ratio of exacerbations COPD ICS vs non-ICS treatment among patients with baseline BEC  $\geq 3\%$

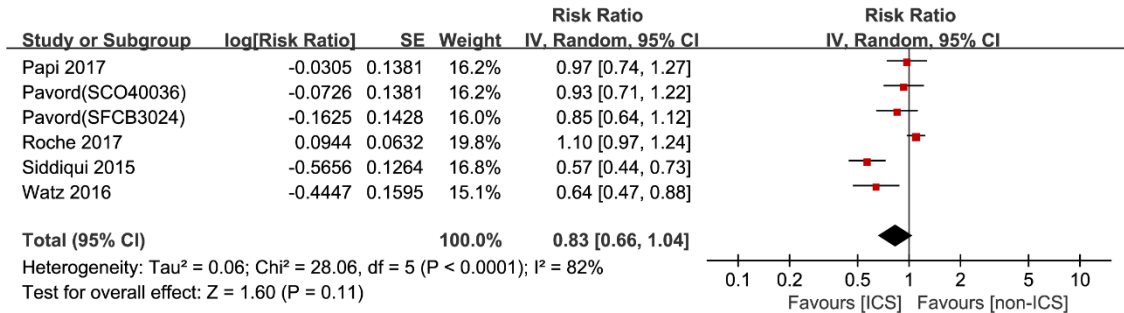

**Figure S22.** The risk ratio of exacerbations COPD ICS vs non-ICS treatment among patients with baseline BEC < 3%

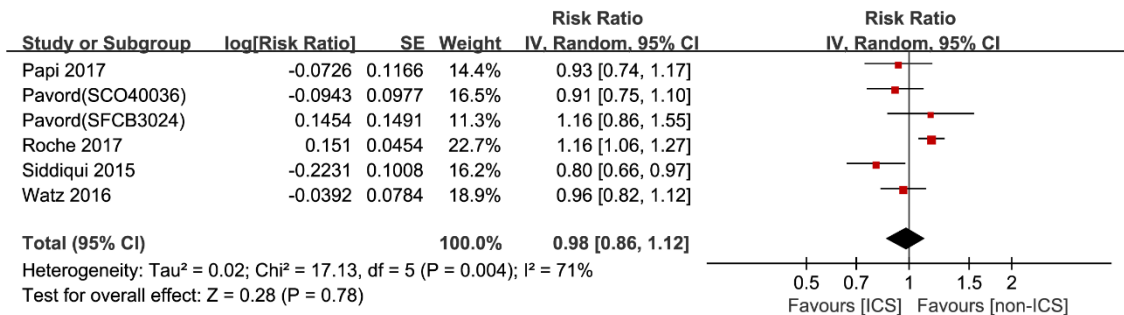

**Figure S23.** The risk ratio of exacerbations COPD ICS vs non-ICS treatment among patients with baseline BEC  $\geq 150$  cells/ $\mu$ L

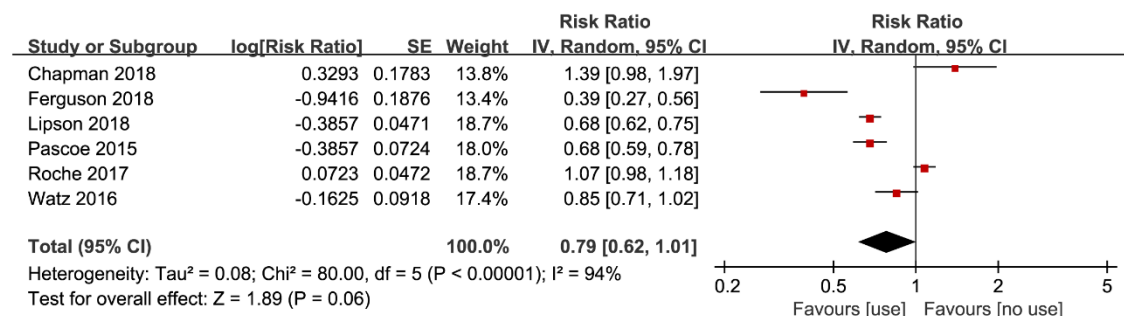

**Figure S24.** The risk ratio of exacerbations COPD ICS vs non-ICS treatment among patients with baseline BEC < 150 cells/ $\mu$ L

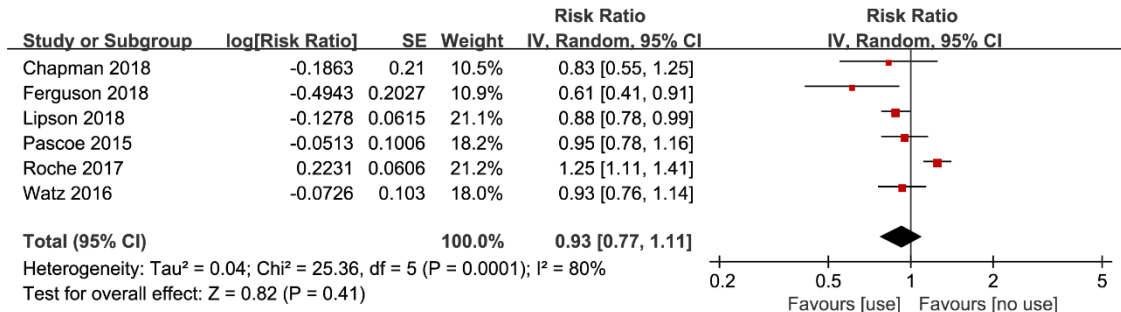

**Figure S25.** The risk ratio of exacerbations COPD ICS vs non-ICS treatment among patients with baseline BEC  $\geq$  200 cells/ $\mu$ L

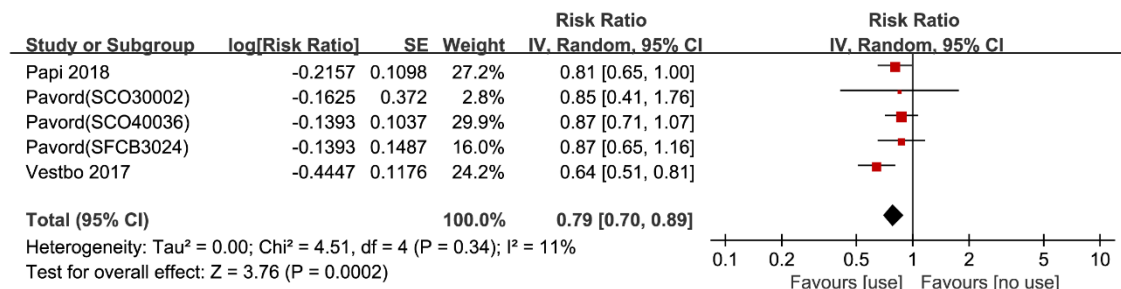

**Figure S26.** The risk ratio of exacerbations COPD ICS vs non-ICS treatment among patients with baseline BEC < 200 cells/ $\mu$ L

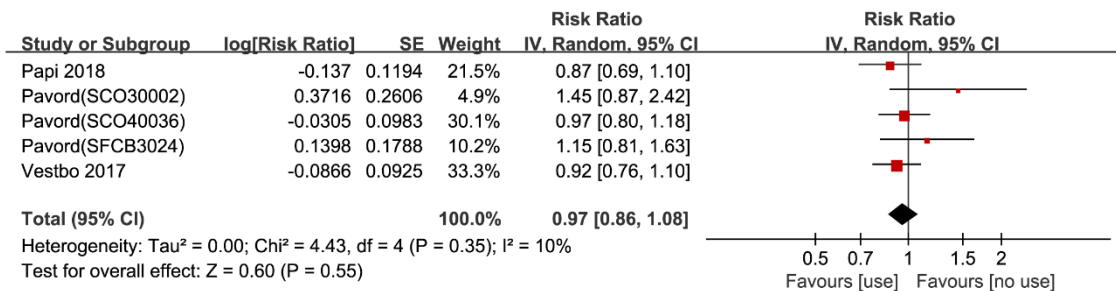

**Figure S27.** The risk ratio of exacerbations COPD ICS vs non-ICS treatment among patients with baseline BEC  $\geq 300$  cells/ $\mu$ L

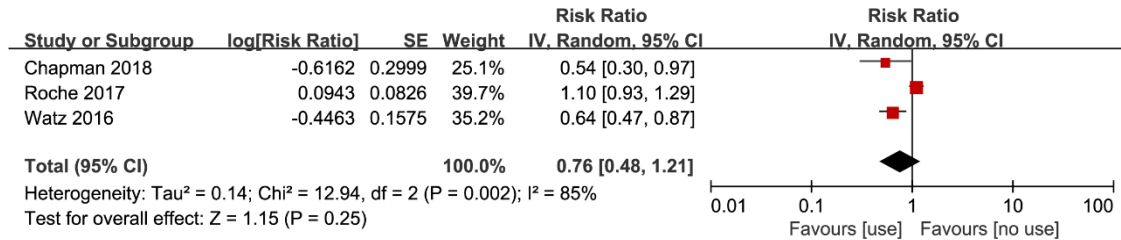

**Figure S28.** The risk ratio of exacerbations COPD ICS vs non-ICS treatment among patients with baseline BEC  $< 300$  cells/ $\mu$ L

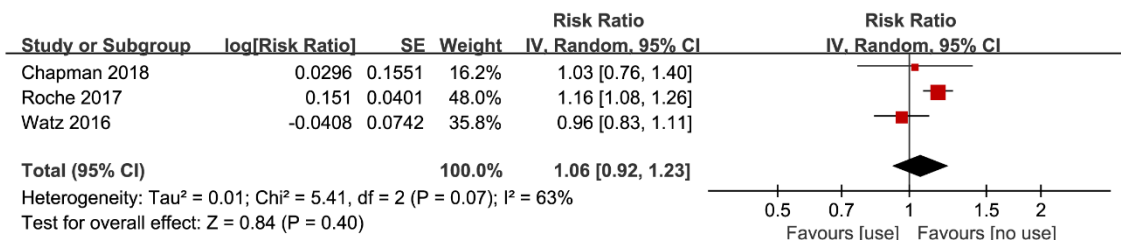

**Figure S29.** The odds ratio of exacerbations COPD baseline BEC  $\geq 2\%$  vs baseline BEC  $< 2\%$

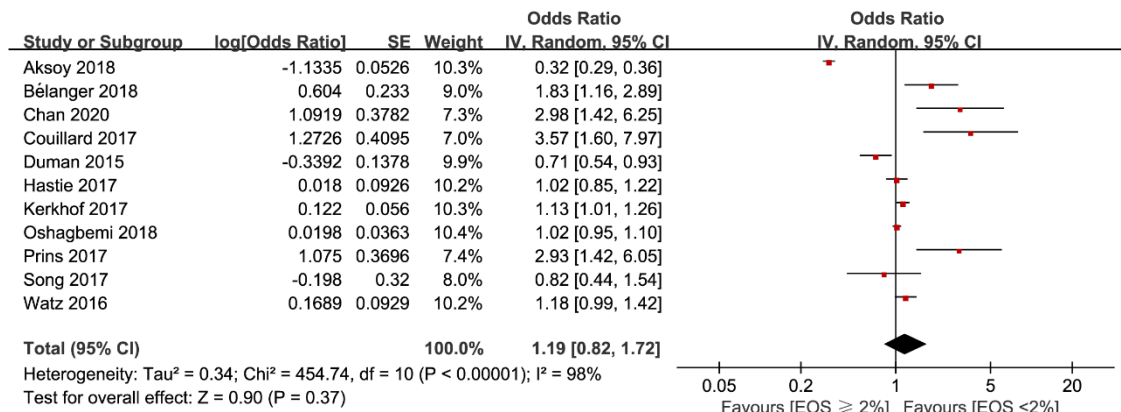



**Figure S30.** The odds ratio of exacerbations COPD baseline BEC  $\geq 3\%$  vs baseline BEC  $< 3\%$

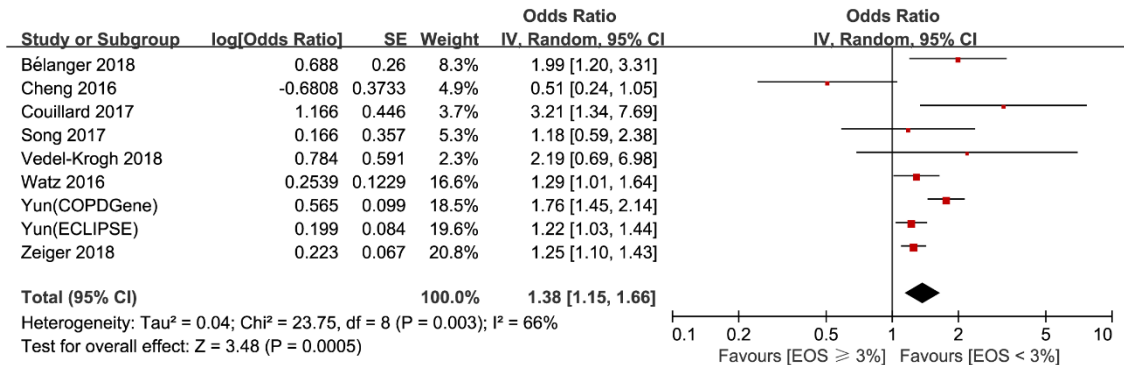

**Figure S31.** The odds ratio of exacerbations COPD baseline BEC  $\geq 4\%$  vs baseline BEC  $< 4\%$

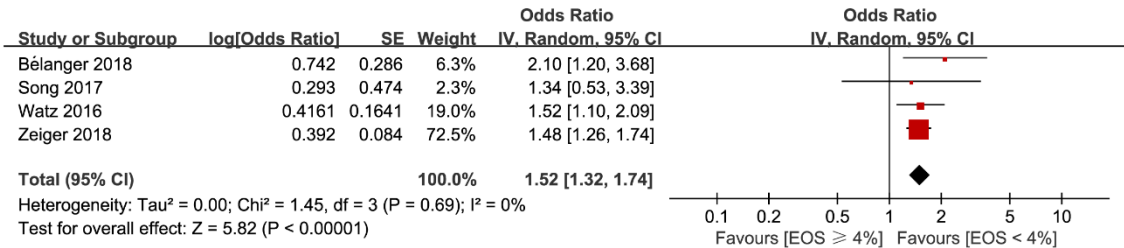

**Figure S32.** The odds ratio of exacerbations COPD baseline BEC  $\geq 5\%$  vs baseline BEC  $< 5\%$

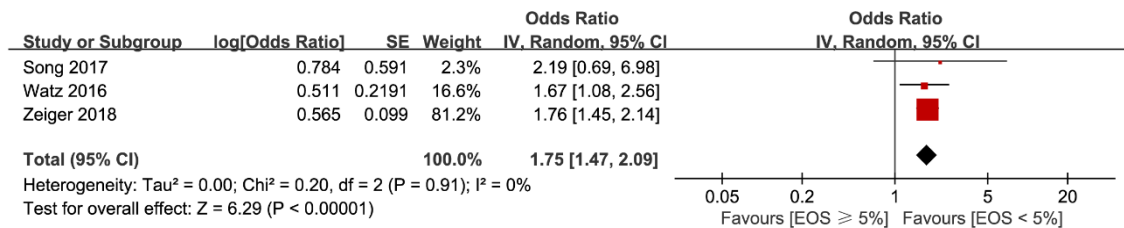

**Figure S33.** The odds ratio of exacerbations COPD baseline BEC  $\geq 150$  cells/ $\mu$ L vs baseline BEC  $< 150$  cells/ $\mu$ L

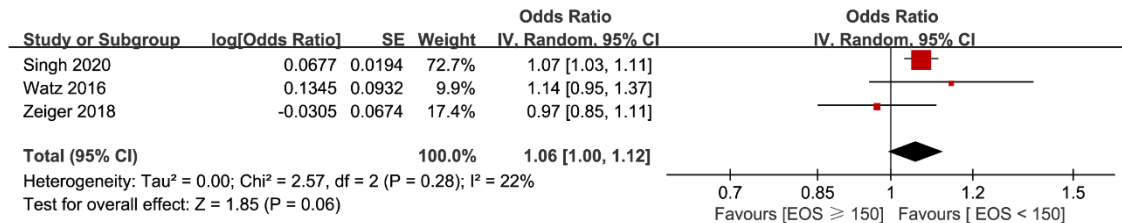

**Figure S34.** The odds ratio of exacerbations COPD baseline BEC  $\geq 200$  cells/ $\mu$ L vs baseline BEC  $< 200$  cells/ $\mu$ L

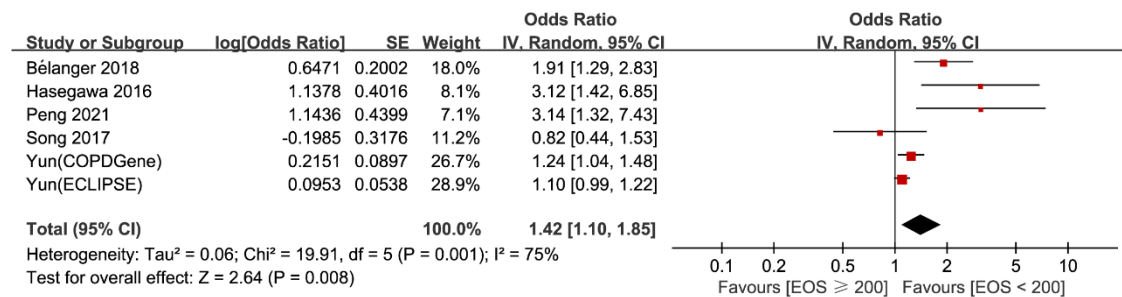

**Figure S35.** The odds ratio of exacerbations COPD baseline BEC  $\geq 300$  cells/ $\mu$ L vs baseline BEC  $< 300$  cells/ $\mu$ L

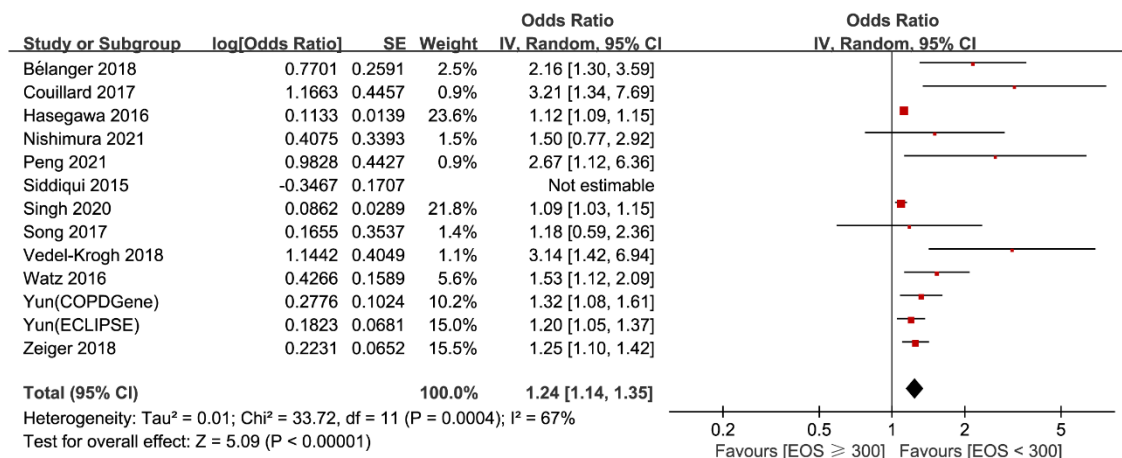

**Figure S36.** The odds ratio of exacerbations COPD baseline BEC  $\geq 400$  cells/ $\mu$ L vs baseline BEC  $< 400$  cells/ $\mu$ L

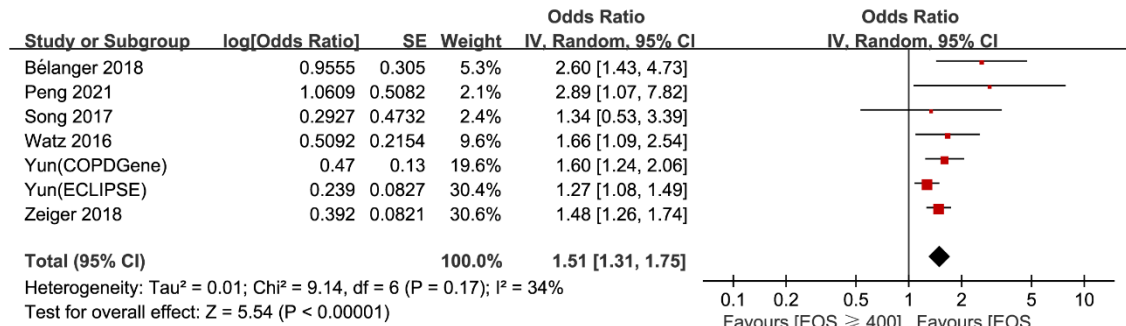

**Figure S37.** The odds ratio of exacerbations COPD baseline BEC  $\geq 500$  cells/ $\mu$ L vs baseline BEC  $< 500$  cells/ $\mu$ L

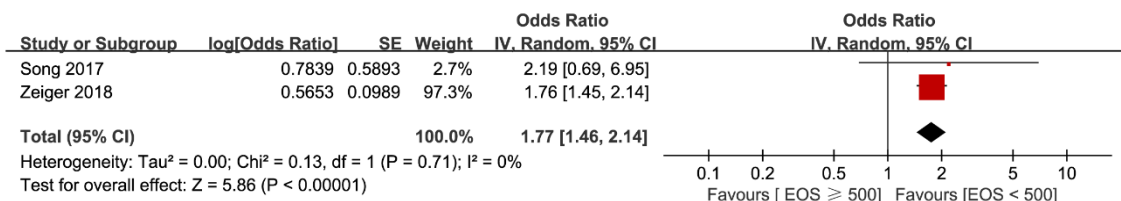

**Figure S38.** The hazard ratio of mortality baseline BEC  $\geq 2\%$  vs baseline BEC  $< 2\%$

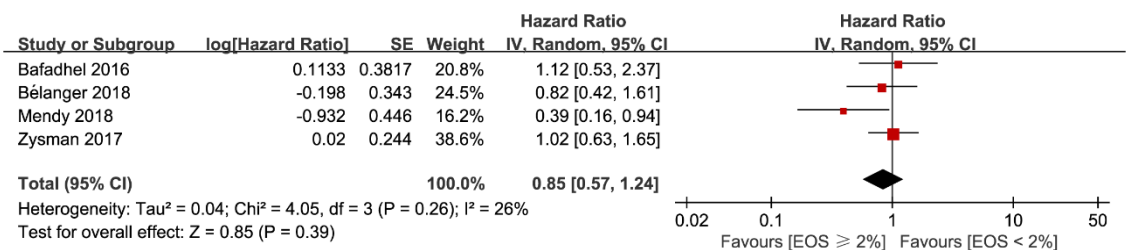

**Figure S39.** The hazard ratio of mortality baseline BEC  $\geq 200$  cells/ $\mu$ L vs baseline BEC  $< 200$  cells/ $\mu$ L

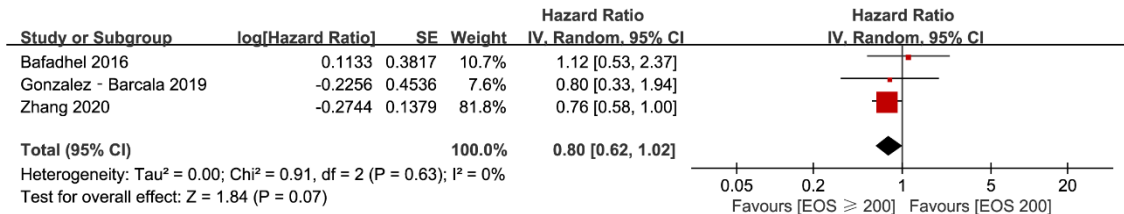

**Figure S40.** The hazard ratio of mortality baseline BEC  $\geq 300$  cells/ $\mu$ L vs baseline BEC  $< 300$  cells/ $\mu$ L

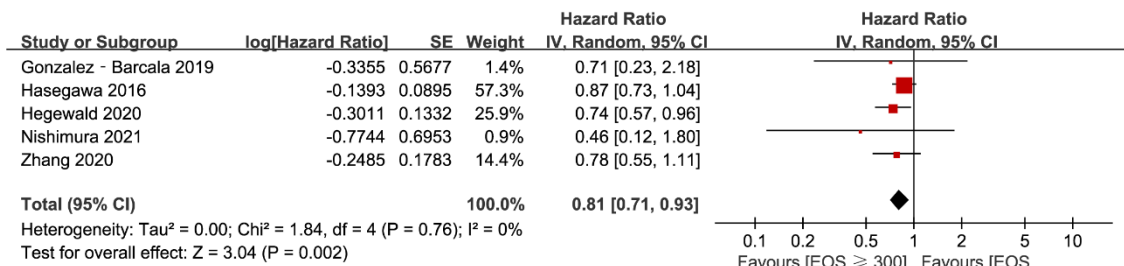

**Figure S41.** The odds ratio of GOLD III+IV in patients with baseline high BEC vs low BEC

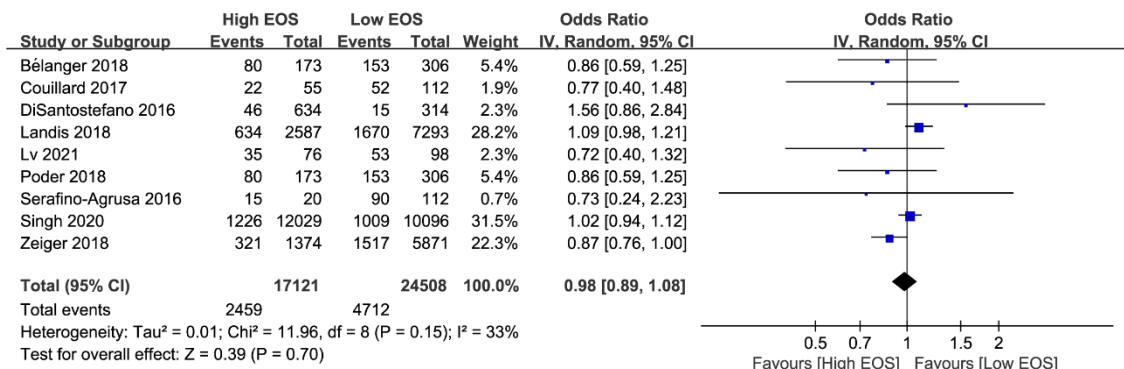

**Figure S42.** The mean difference of baseline FEV1/FVC in patients with baseline high BEC vs low BEC

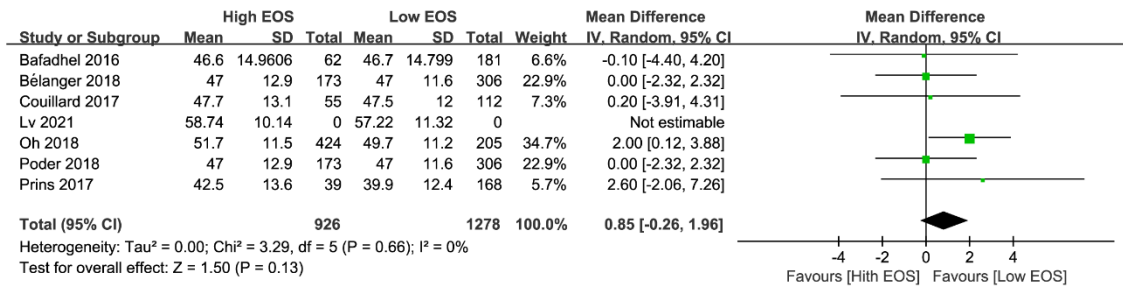

## References

1. Aksoy E, Karakurt Z, Gungor S, *et al.* Neutrophil to lymphocyte ratio is a better indicator of COPD exacerbation severity in neutrophilic endotypes than eosinophilic endotypes. *International journal of chronic obstructive pulmonary disease* 2018; 13: 2721-2730.
2. Bafadhel M, Greening NJ, Harvey-Dunstan TC, *et al.* Blood Eosinophils and Outcomes in Severe Hospitalized Exacerbations of COPD. *Chest* 2016; 150: 320-328.
3. Bélanger M, Couillard S, Courteau J, *et al.* Eosinophil counts in first COPD hospitalizations: a comparison of health service utilization. *International journal of chronic obstructive pulmonary disease* 2018; 13: 3045-3054.
4. Chan MC, Yeung YC, Yu ELM and Yu WC. Blood Eosinophil and Risk of Exacerbation in Chronic Obstructive Pulmonary Disease Patients: A Retrospective Cohort Analysis</p>. *International Journal of Chronic Obstructive Pulmonary Disease* 2020; Volume 15: 2869-2877.
5. Cheng S-L and Lin C-H. Effectiveness using higher inhaled corticosteroid dosage in patients with COPD by different blood eosinophilic counts. *International journal of chronic obstructive pulmonary disease* 2016; 11: 2341-2348.
6. Couillard S, Larivée P, Courteau J and Vanasse A. Eosinophils in COPD Exacerbations Are Associated With Increased Readmissions. *Chest* 2017; 151: 366-373.
7. DiSantostefano RL, Hinds D, Le HV and Barnes NC. Relationship between blood eosinophils and clinical characteristics in a cross-sectional study of a US population-based COPD cohort. *Respiratory medicine* 2016; 112: 88-96.
8. Duman D, Aksoy E, Agca MC, *et al.* The utility of inflammatory markers to predict readmissions and mortality in COPD cases with or without eosinophilia. *International journal*

- of chronic obstructive pulmonary disease* 2015; 10: 2469-2478.
9. Gonzalez-Barcala FJ, San-Jose ME, Nieto-Fontarigo JJ, *et al.* Blood eosinophils could be useful as a biomarker in chronic obstructive pulmonary disease exacerbations. *International Journal of Clinical Practice* 2019; 73.
  10. Hasegawa K and Camargo CA. Prevalence of blood eosinophilia in hospitalized patients with acute exacerbation of COPD. *Respirology* 2016; 21: 761-764.
  11. Hastie AT, Martinez FJ, Curtis JL, *et al.* Association of sputum and blood eosinophil concentrations with clinical measures of COPD severity: an analysis of the SPIROMICS cohort. *The Lancet Respiratory medicine* 2017; 5: 956-967.
  12. Hegewald MJ, Horne BD, Trudo F, *et al.* Blood Eosinophil Count and Hospital Readmission in Patients with Acute Exacerbation of Chronic Obstructive Pulmonary Disease. *International Journal of Chronic Obstructive Pulmonary Disease* 2020; Volume 15: 2629-2641.
  13. Kerkhof M, Sonnappa S, Postma DS, *et al.* Blood eosinophil count and exacerbation risk in patients with COPD. *The European respiratory journal* 2017; 50: 1700761.
  14. Landis S, Suruki R, Maskell J, Bonar K, Hilton E and Compton C. Demographic and Clinical Characteristics of COPD Patients at Different Blood Eosinophil Levels in the UK Clinical Practice Research Datalink. *COPD* 2018; 15: 177-184.
  15. Lv M-Y, Qiang L-X, Li Z-H and Jin S-D. The lower the eosinophils, the stronger the inflammatory response? The relationship of different levels of eosinophils with the degree of inflammation in acute exacerbation chronic obstructive pulmonary disease (AECOPD). *Journal of Thoracic Disease* 2021; 13: 232-243.
  16. Mendy A, Forno E, Niyonsenga T and Gasana J. Blood biomarkers as predictors of long-term

- mortality in COPD. *The clinical respiratory journal* 2018; 12: 1891-1899.
17. Nishimura K, Kusunose M, Sanda R, Mori M, Shibayama A and Nakayasu K. Is Blood Eosinophil Count a Biomarker for Chronic Obstructive Pulmonary Disease in a Real-World Clinical Setting? Predictive Property and Longitudinal Stability in Japanese Patients. *Diagnostics* 2021; 11: 404.
  18. Oh Y-M, Lee KS, Hong Y, *et al.* Blood eosinophil count as a prognostic biomarker in COPD. *International journal of chronic obstructive pulmonary disease* 2018; 13: 3589-3596.
  19. Oshagbemi OA, Franssen FME, Braeken DCW, *et al.* Blood eosinophilia, use of inhaled corticosteroids, and risk of COPD exacerbations and mortality. *Pharmacoepidemiology and Drug Safety* 2018; 27: 1191-1199.
  20. Peng J, Yu Q, Fan S, *et al.* High Blood Eosinophil and YKL-40 Levels, as Well as Low CXCL9 Levels, are Associated with Increased Readmission in Patients with Acute Exacerbation of Chronic Obstructive Pulmonary Disease. *International Journal of Chronic Obstructive Pulmonary Disease* 2021; Volume 16: 795-806.
  21. Poder TG, Carrier N, Bélanger M, *et al.* Eosinophil counts in first COPD hospitalizations: a 1-year cost analysis in Quebec, Canada. *International journal of chronic obstructive pulmonary disease* 2018; 13: 3065-3076.
  22. Prins HJ, Duijkers R, Lutter R, *et al.* Blood eosinophilia as a marker of early and late treatment failure in severe acute exacerbations of COPD. *Respiratory Medicine* 2017; 131: 118-124.
  23. Roche N, Chapman KR, Vogelmeier CF, *et al.* Blood Eosinophils and Response to Maintenance Chronic Obstructive Pulmonary Disease Treatment. Data from the FLAME Trial. *American journal of respiratory and critical care medicine* 2017; 195: 1189-1197.



24. Serafino-Agrusa L, Scichilone N, Spatafora M and Battaglia S. Blood eosinophils and treatment response in hospitalized exacerbations of chronic obstructive pulmonary disease: A case-control study. *Pulmonary pharmacology & therapeutics* 2016; 37: 89-94.
25. Song JH, Lee C-H, Kim JW, *et al.* Clinical implications of blood eosinophil count in patients with non-asthma-COPD overlap syndrome COPD. *International journal of chronic obstructive pulmonary disease* 2017; 12: 2455-2464.
26. Vedel-Krogh S, Nordestgaard BG, Lange P, Vestbo J and Nielsen SF. Blood eosinophil count and risk of pneumonia hospitalisations in individuals with COPD. *The European respiratory journal* 2018; 51: 1800120.
27. Yun JH, Lamb A, Chase R, *et al.* Blood eosinophil count thresholds and exacerbations in patients with chronic obstructive pulmonary disease. *The Journal of allergy and clinical immunology* 2018; 141: 2037-2047.e2010.
28. Zeiger RS, Tran TN, Butler RK, *et al.* Relationship of Blood Eosinophil Count to Exacerbations in Chronic Obstructive Pulmonary Disease. *The journal of allergy and clinical immunology In practice* 2018; 6: 944-954.e945.
29. Zhang Y, Liang L-R, Zhang S, *et al.* Blood Eosinophilia and Its Stability in Hospitalized COPD Exacerbations are Associated with Lower Risk of All-Cause Mortality. *International Journal of Chronic Obstructive Pulmonary Disease* 2020; Volume 15: 1123-1134.
30. Zysman M, Deslee G, Caillaud D, *et al.* Relationship between blood eosinophils, clinical characteristics, and mortality in patients with COPD. *International journal of chronic obstructive pulmonary disease* 2017; 12: 1819-1824.
